# Supplementary material for: The scavenging capacity of γ-aminobutyric acid for acrolein and the cytotoxicity of the formed adduct
Source: Royal Society of Chemistry journal article supplement (doi:10.1039/c9fo02518a), 2020-01-01
Supplement: c9fo02518a1.pdf [file c9fo02518a1.pdf]

## Supplementary materials

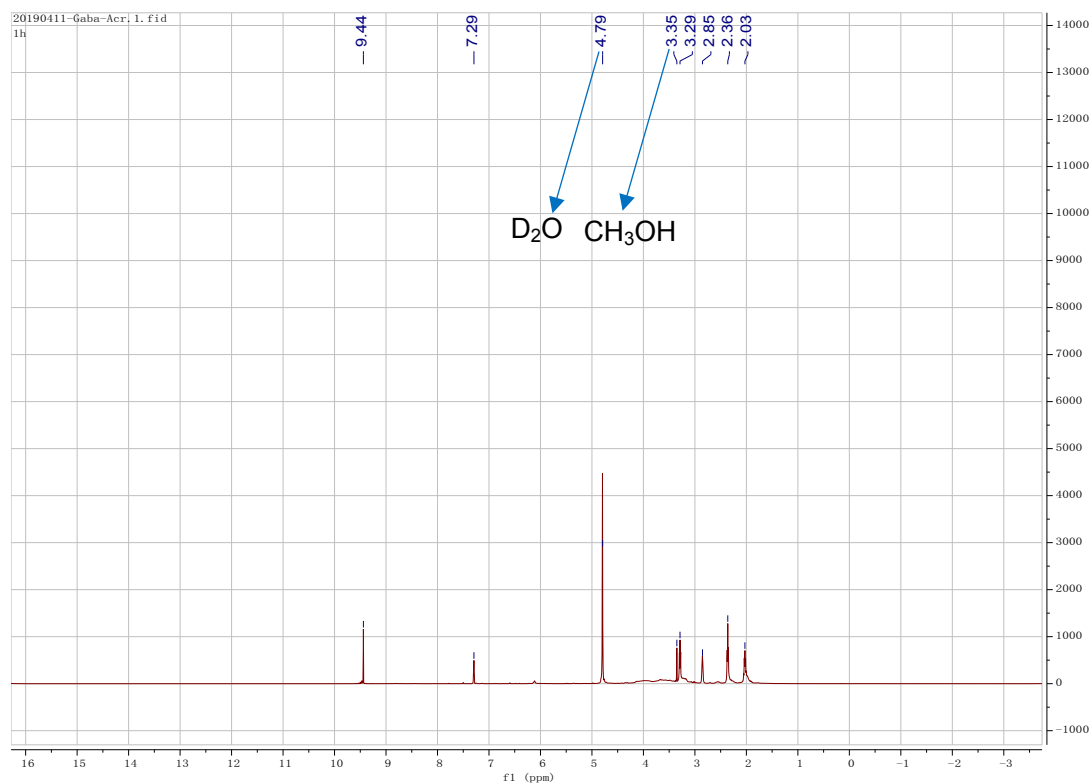

Fig. S1 <sup>1</sup>H-NMR spectrum of acrolein-GABA adduct.

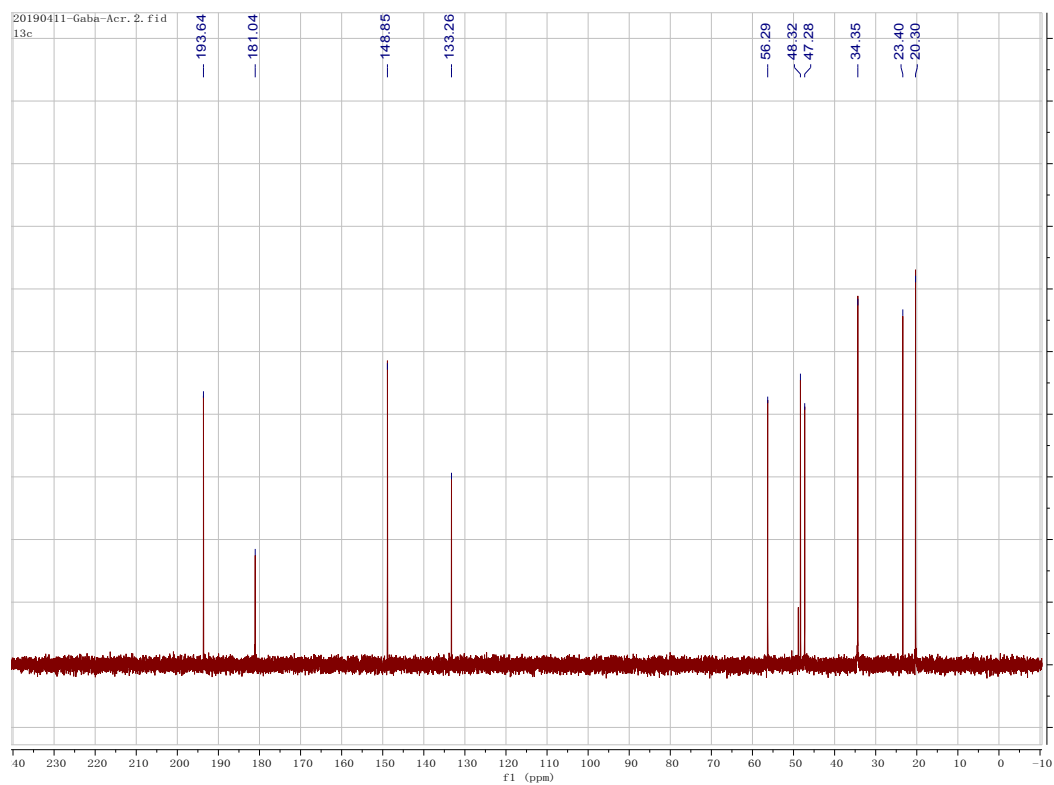

Fig. S2 <sup>13</sup>C-NMR spectrum of acrolein-GABA adduct.

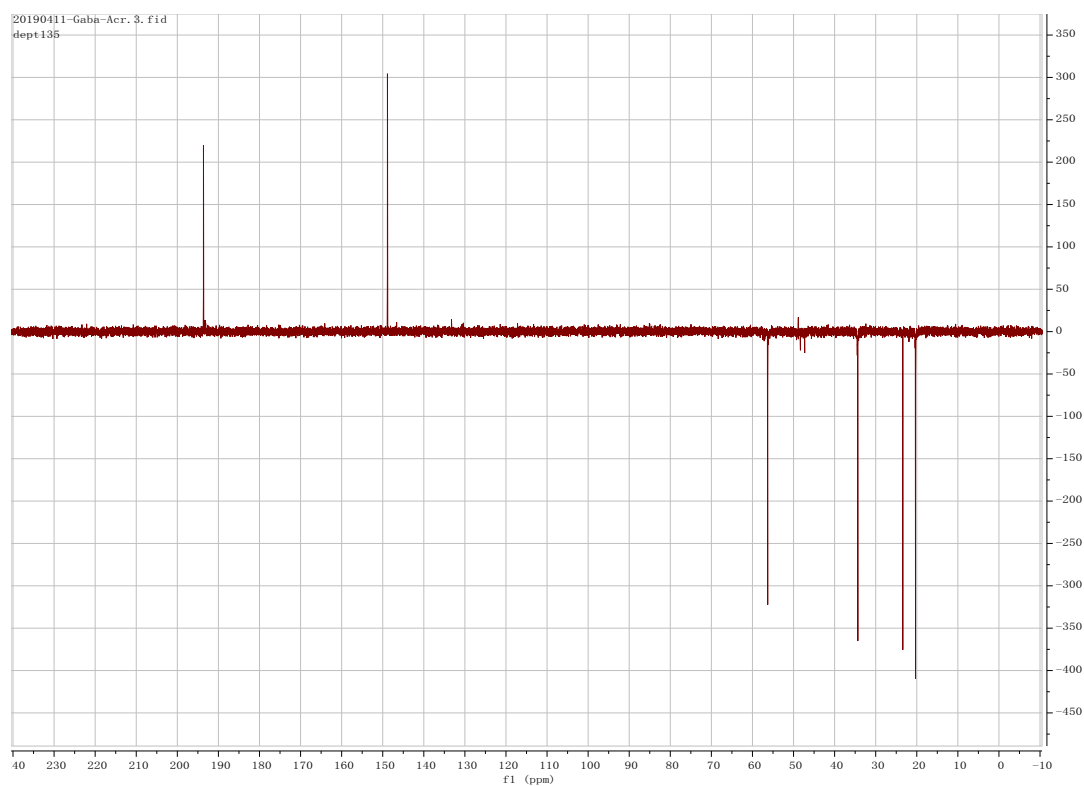

Fig. S3 Dept 135-NMR spectrum of acrolein-GABA adduct.

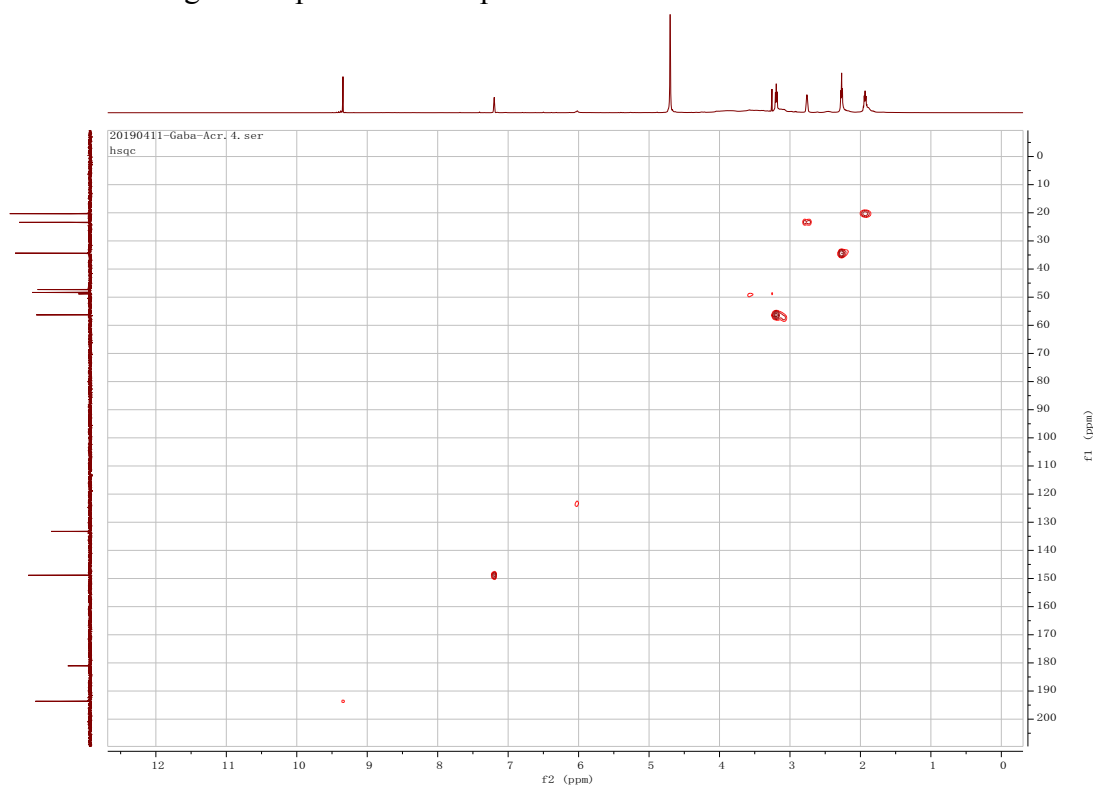

Fig. S4 HSQC-NMR spectrum of acrolein-GABA adduct.

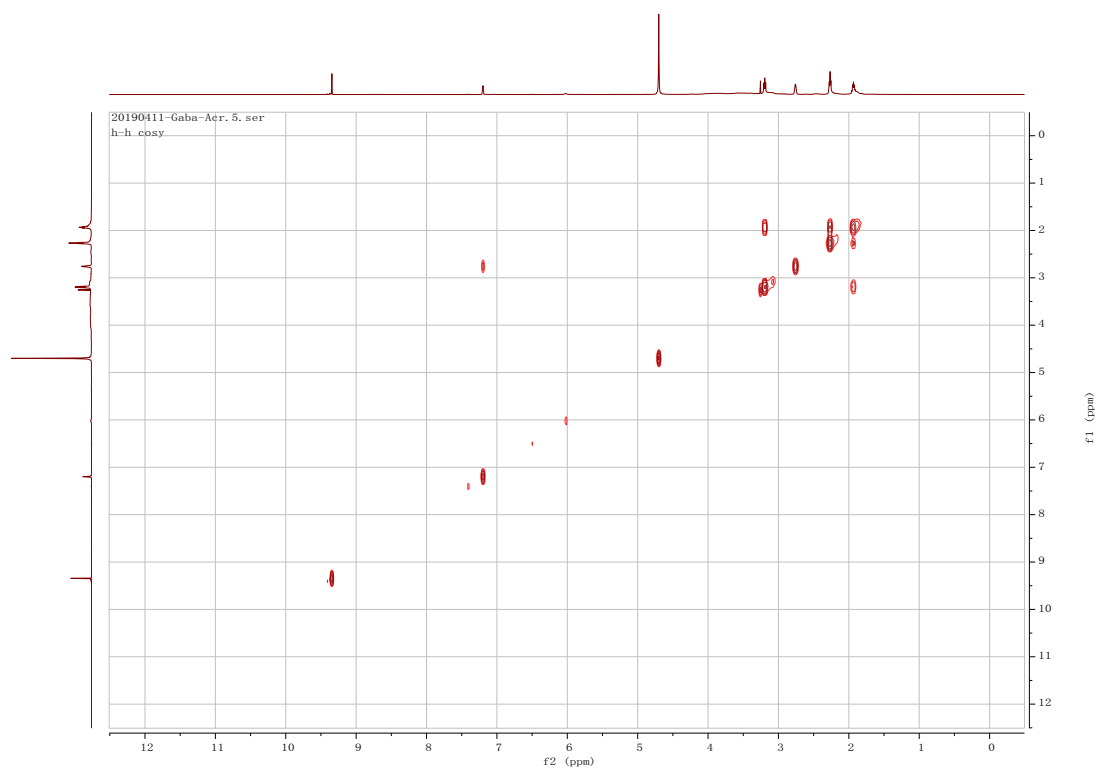

Fig. S5 H, H COSY-NMR spectrum of acrolein-GABA adduct.

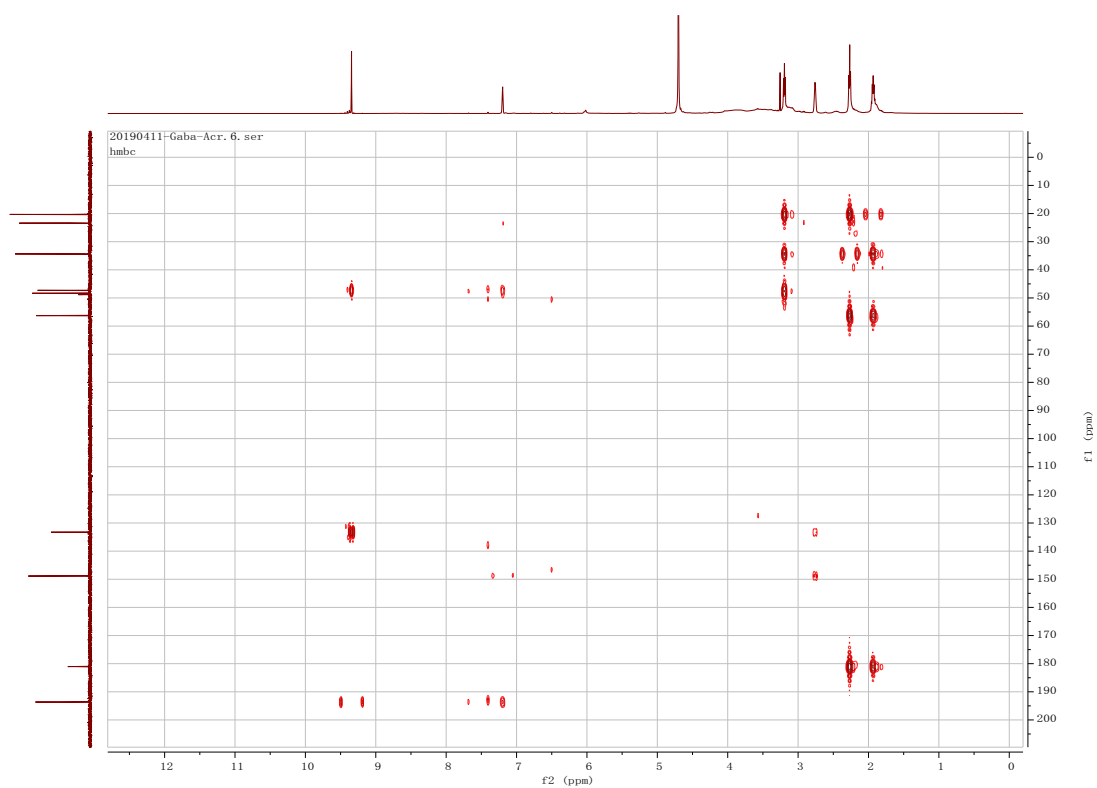

Fig. S6 HMBC-NMR spectrum of acrolein-GABA adduct.

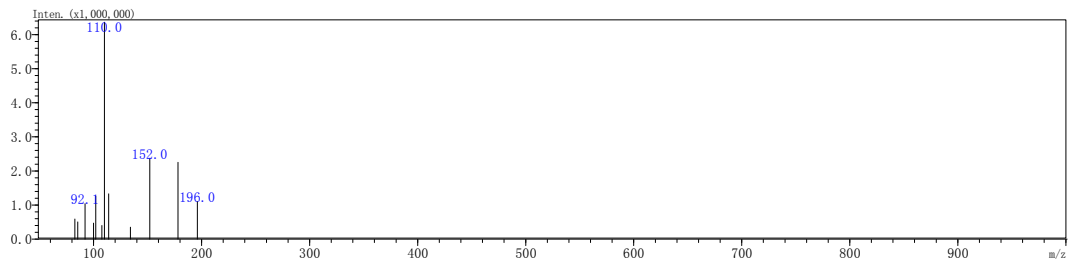

Fig. S7 LC-MS/MS spectrum of acrolein-GABA adduct.

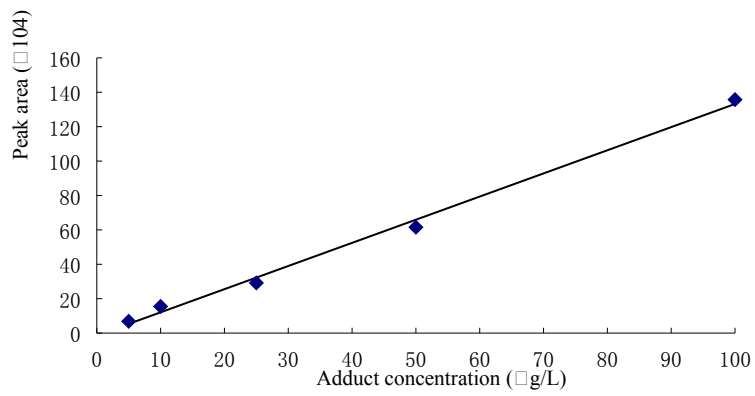

Fig. S8 The standard curve for GABA-acrolein adduct.

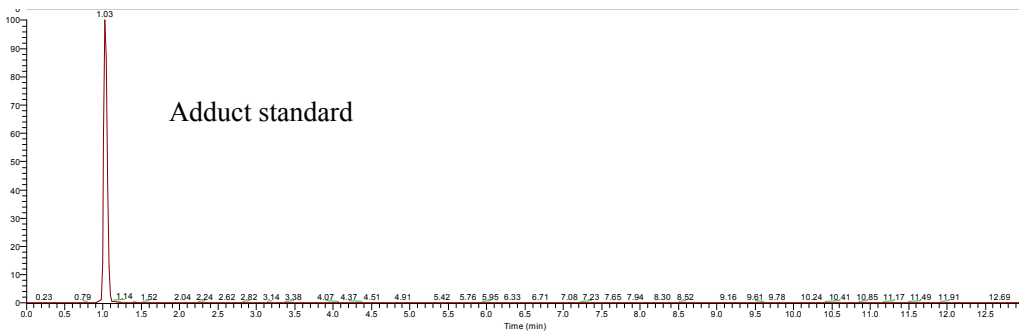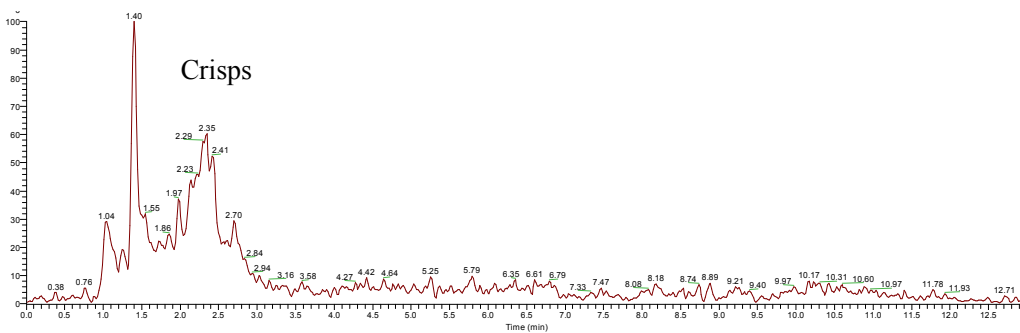

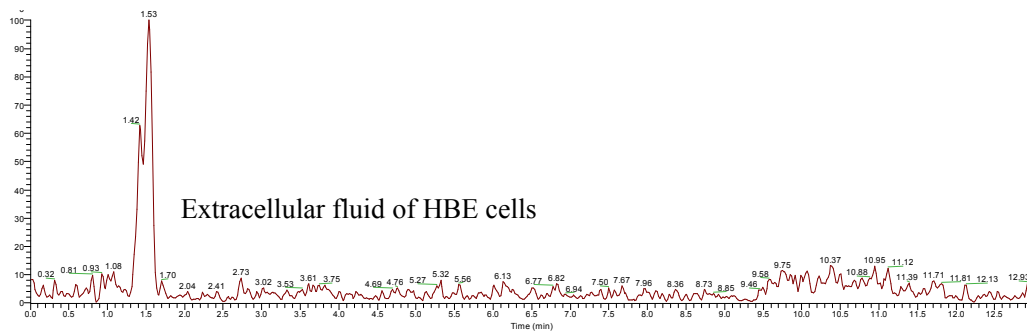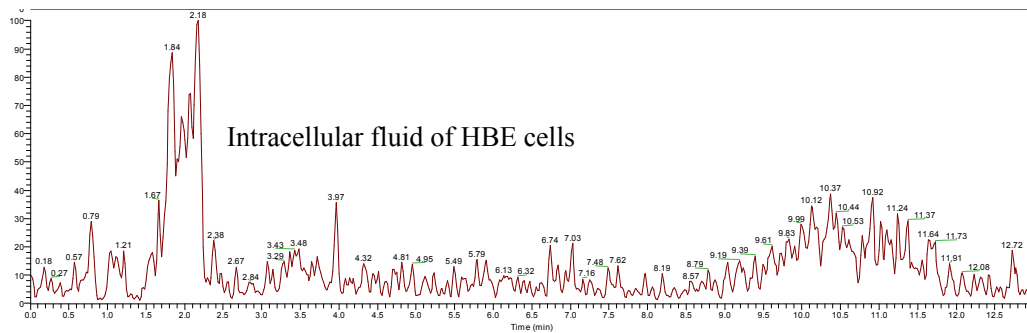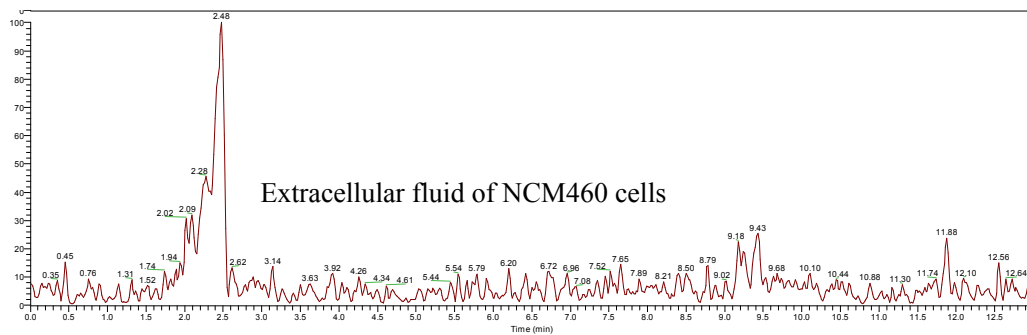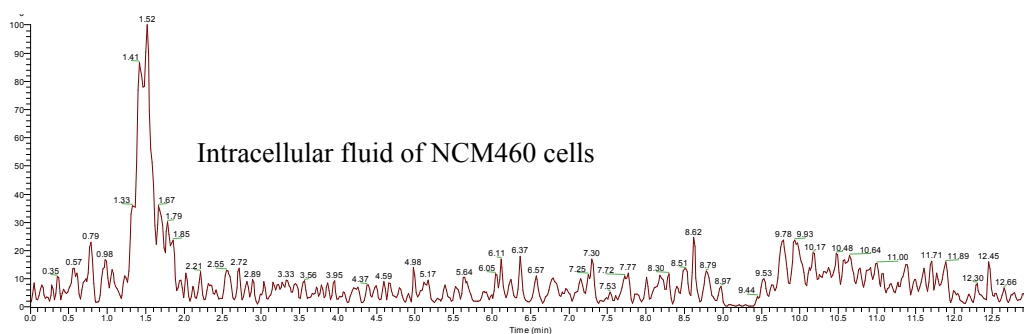

Fig. S9 Total ion chromatogram of the adduct standard, crisps, and extracellular and intracellular fluids.
